# Supplementary material for: Efficient performance optimization of natural graphite enabled by hydrothermal modification with Mg(NO3)2
Source: Royal Society of Chemistry journal article supplement (doi:10.1039/d2nj01247b), 2022-01-01
Supplement: d2nj01247b1.pdf [file d2nj01247b1.pdf]

## Supplementary Materials

### Efficient performance optimization of natural graphite enabled by hydrothermal modification with $\text{Mg}(\text{NO}_3)_2$

Wen-Jing Wang<sup>a</sup>, Meng Huang<sup>a</sup>, Hui-Ling Zhu<sup>b</sup>, Wei Liu<sup>a</sup>, Yong-Xin Qi<sup>a</sup>, Tao Li<sup>\*a</sup> and Yu-Jun Bai<sup>\*a</sup>

<sup>a</sup>Key Laboratory of Liquid-Solid Structural Evolution and Processing of Materials of Ministry of Education, State Key Laboratory of Crystal Materials, Shandong University, Jinan, Shandong, 250061, China

<sup>b</sup>School of Materials Science and Engineering, Shandong University of Science and Technology, Qingdao, 266590, PR China

Corresponding Author:

\* Email: [byj97@126.com](mailto:byj97@126.com) (Y.-J. Bai). Tel/Fax: +86 531 88392315.

\* Email: [tao.li@sdu.edu.cn](mailto:tao.li@sdu.edu.cn) (L. Li). Tel/Fax: +86 531 88392315.

**Keywords:** graphite anode,  $\text{Mg}(\text{NO}_3)_2$ , modification, cyclability

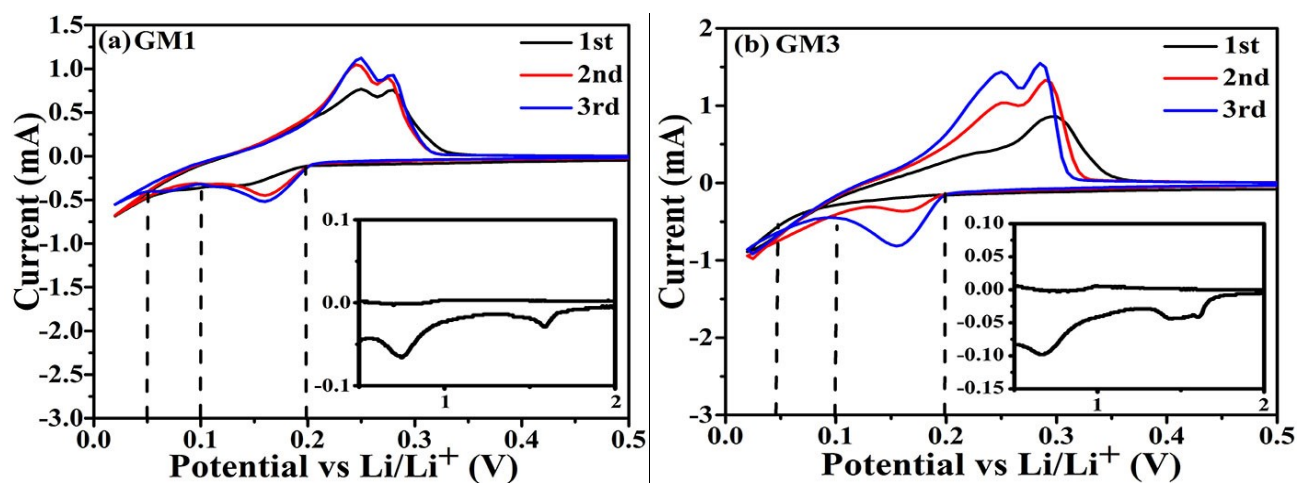

Fig. S1. CV plots of (a) GM1, (b) GM3 at  $0.1 \text{ mV s}^{-1}$ .

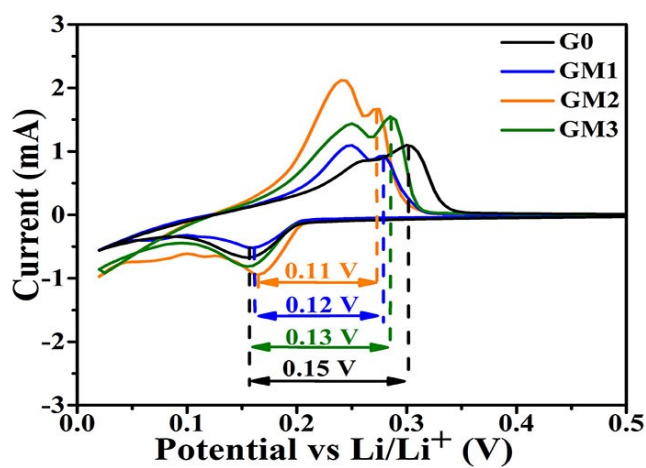

Fig. S2. CV plots of G0, GM1, GM2, GM3 after 3 cycles at  $0.1 \text{ mV s}^{-1}$ .

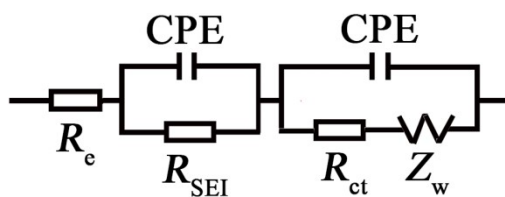

Fig. S3. Corresponding equivalent circuit after 3 cycles.

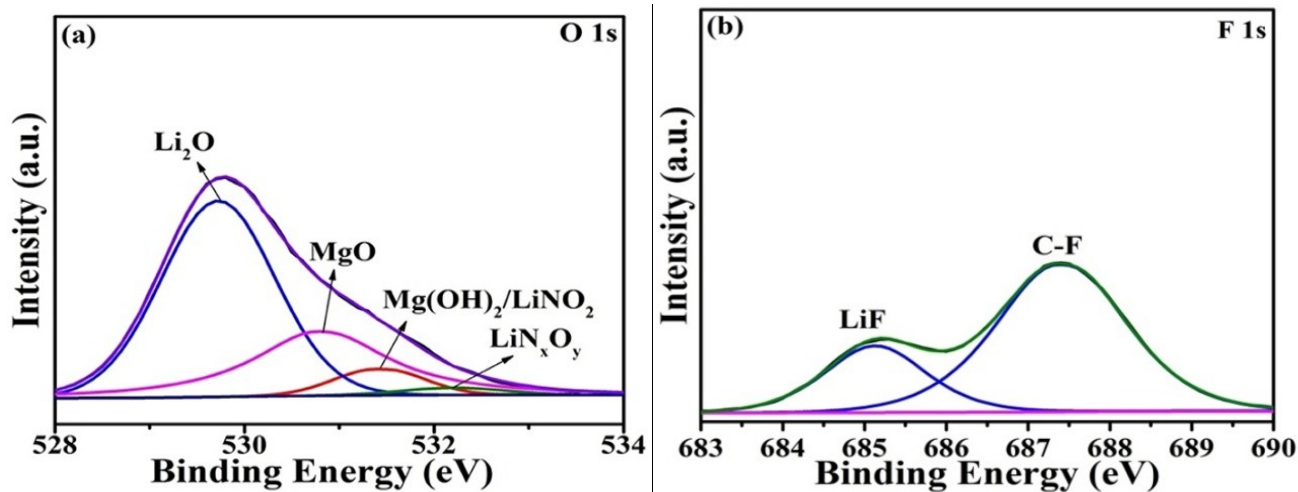

Fig. S4. XPS spectra of (a) O 1s, (b) F 1s of GM2 after 30 cycles.

Table S1 Fitted impedance ( $\Omega$ ) for G0, GM1, GM2 and GM3

| Sample | $R_e$ | $R_{\text{SEI}}$ | $R_{\text{ct}}$ | $R_{\text{T}}$ |
|--------|-------|------------------|-----------------|----------------|
| G0     | 1.6   | 170.4            | 101.2           | 273.2          |
| GM1    | 0.8   | 64.1             | 55.3            | 120.2          |
| GM2    | 2.2   | 61.4             | 53.6            | 117.2          |
| GM3    | 1.6   | 97.3             | 65.3            | 164.2          |
